# Supplementary material for: Crosstalk among Indoleamines, Neuropeptides and JH/20E in Regulation of Reproduction in the American Cockroach, Periplaneta americana
Source: MDPI journal article supplement (doi:10.3390/insects11030155), 2020-03-01
Supplement: s1 [file s1]

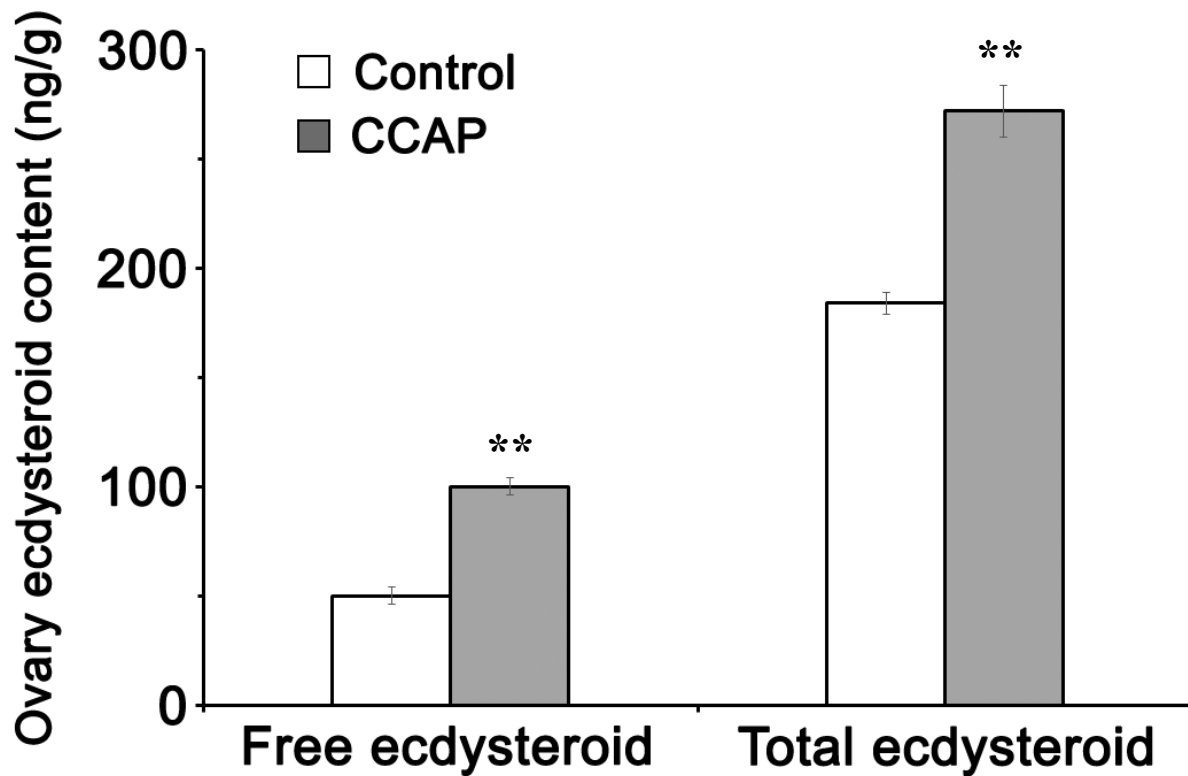

**Figure S1.** Effect of CCAP injection on ovarian ecdysteroid concentrations. Ten pmol of CCAP (in 5  $\mu$ L of PBS) was injected daily into the hemocoel of female adults from day 1 to day 15. Control insects were injected with 5  $\mu$ L of PBS. On day 15, ovaries were dissected and ecdysteroid level was measured by the EIA. Data are expressed as mean  $\pm$  SEM (n=25 individuals/condition). \*\*: represent significant difference ( $p < 0.01$ ) as compared to the control group, using Tukey's test.
